# Supplementary material for: Ntann12 annexin expression is induced by auxin in tobacco roots
Source: PubMed Central journal article supplement — J Exp Bot. 2011 May 4;62(11):4055–65. doi: 10.1093/jxb/err112 (PMC3134359; doi:10.1093/jxb/err112), 2011-05-04
Supplement: supp_err112_00057695-file001.pdf [file supp_err112_00057695-file001.pdf]

## **Supplementary data**

### ***Ntann12* annexin expression is induced by auxin in tobacco roots**

Marie Baucher, Yves Oukouomi Lowe, Olivier M. Vandeputte, Johnny Mukoko Bopopi, Jihad Moussawi, Marjorie Vermeersch, Adeline Mol, Mondher El Jaziri, Fabrice Homblé, and David Pérez-Morga

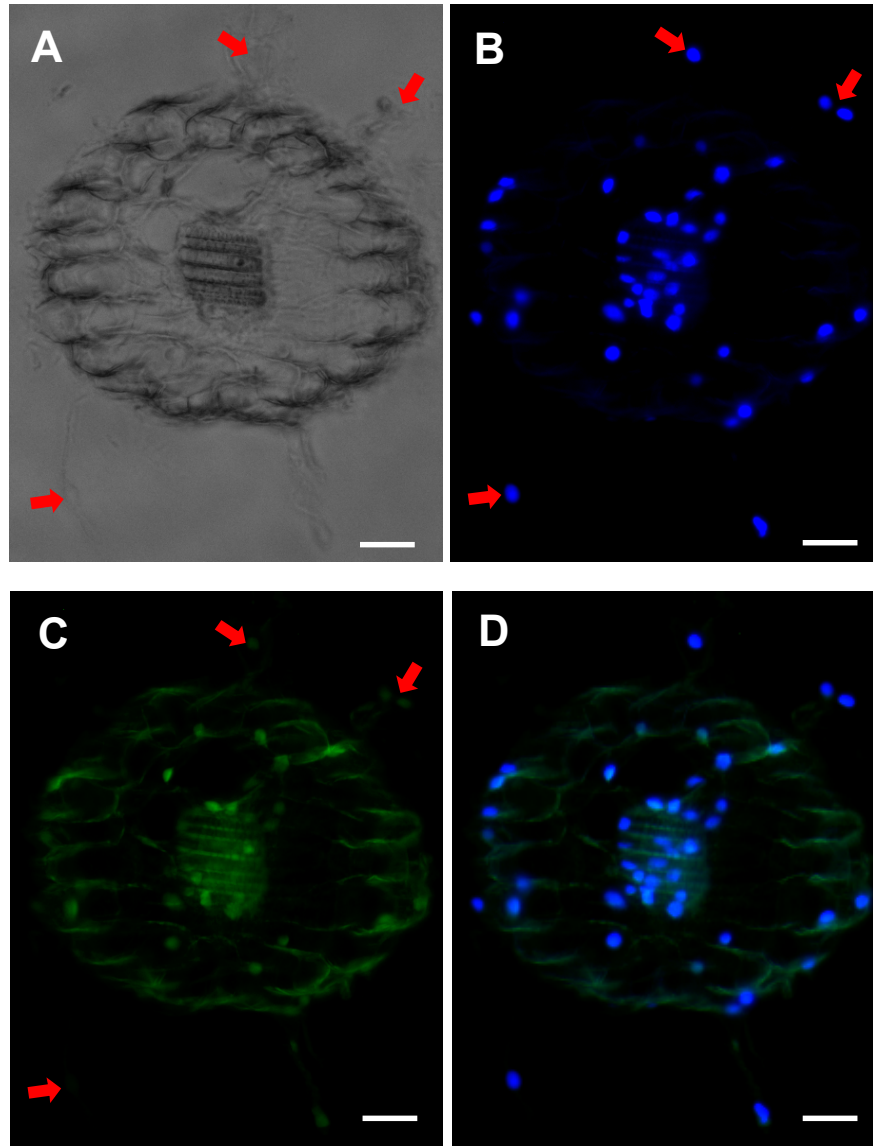

**Fig. S1.** Ntann12 immunolocalization in tobacco root 100  $\mu\text{m}$  cross sections visualized by fluorescence microscopy. A: phase contrast. B: DAPI DNA staining. C: immunostaining with TOYOPEARL AF-Amino-650M-affinity-purified antiserum against Ntann12. D: superposition of B and C. In Panels C-D the green fluorescence is indicative of the presence of Ntann12, and shows that it is not due to DAPI fluorescence contamination since some DAPI-stained nuclei do not show green fluorescence (arrows), also, the pattern of fluorescence of the two fluorochromes is different. Bar = 50  $\mu\text{m}$  (A-D).

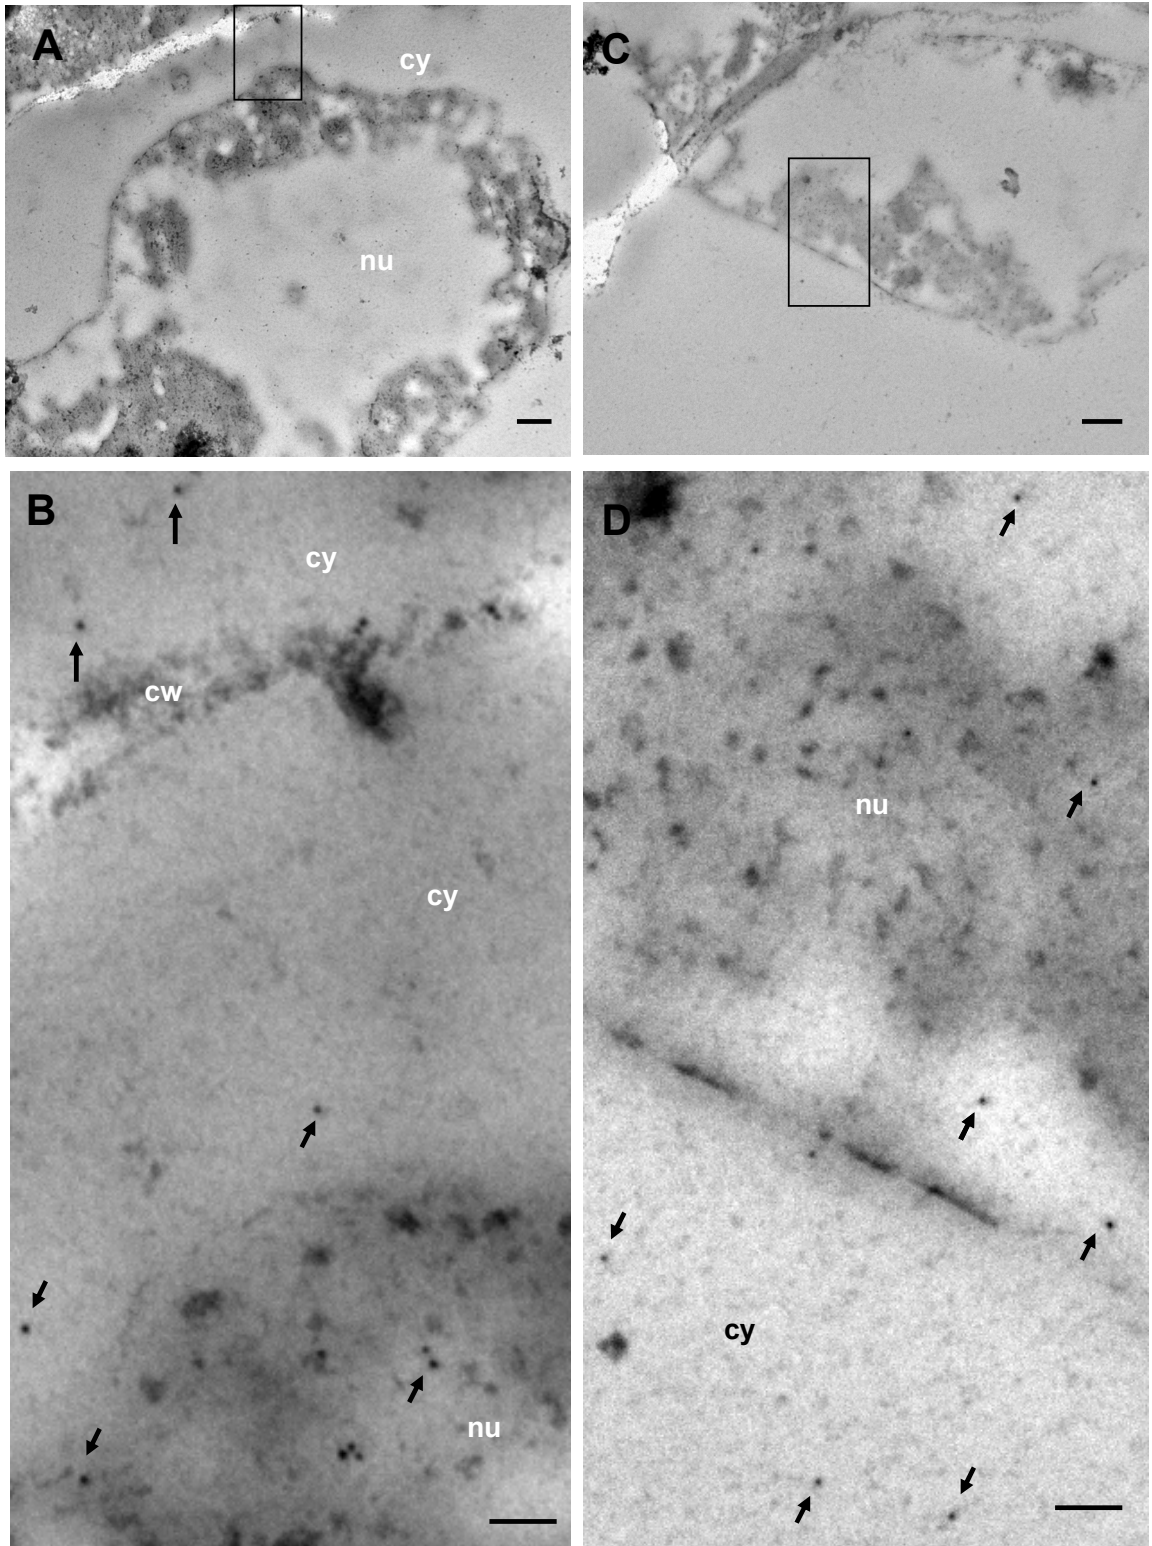

**Fig. S2.** Transmission electron micrographs of Ntann12 immunogold labelling in section of root cells. (A, C, E, G) Sections in root cells. (B, D, F, H) Details of (A, C, E, G) respectively showing labelling in the cytoplasm and in the nucleus (see arrows). Cw, cell wall; cy, cytoplasm; nu nucleus. Bars = 400 nm (A, C, E, G), 50 nm (B, D, F, H). The boxes indicate the details selection.

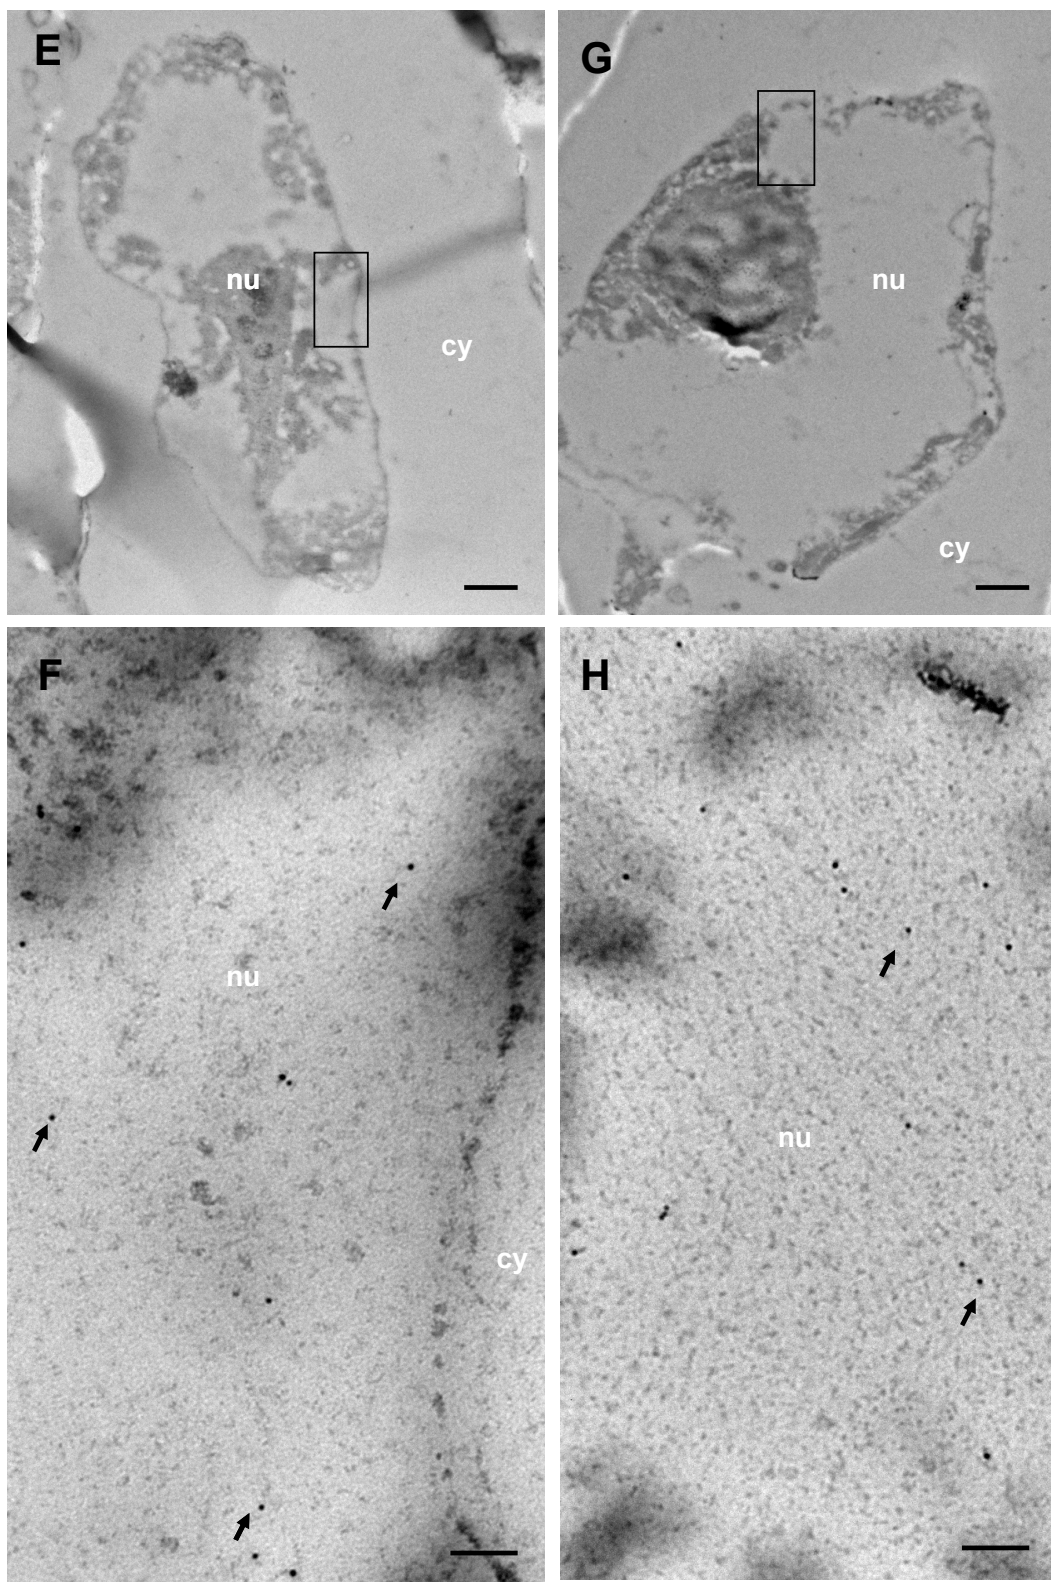

Fig S2 continued

### Supplementary data S3.

## 1 Characterization of T2 transgenic tobacco progenies overexpressing and 2 downregulating *Ntann12*

3

### 4 Material and methods

5 The entry clone BPNTann12 was recombined into the Gateway<sup>TM</sup>-compatible binary  
6 T-DNA destination vectors pK7WG2 and pK7WIWG2, allowing respectively to  
7 increase (p35S-*Ntann12*) or to suppress expression (RNAi) (Karimi et al., 2002).  
8 Plant transformation was performed as described in Vandeputte et al. (2007). Plants  
9 were either grown in solid MS medium or in soil. Transcriptional changes were  
10 calculated based on the comparative  $\Delta\Delta C_T$  method as described by Livak and  
11 Schmittgen (2001) and are reported as ratios between expression in roots and in  
12 leaves of transgenic lines overexpressing (5.1, 6.1, 11.2, 16.2, 19.2) or  
13 downregulating (1.1, 4.2 and 11.4) *Ntann12* and wild type plants (see Materials and  
14 Methods of the the main manuscript). For the germination test, sterilized seeds were  
15 plated on MS medium. Various concentrations of NaCl were added (0, 75, 150 or 250  
16 mM). Three days after sowing, germination (emergence of radicles) was scored daily  
17 for 3 days and 7 days after sowing, hypocotyls lengths were scored daily for 3 days.  
18 Plants were also cultured with 250 mM mannitol, 150  $\mu$ M ABA, 50  $\mu$ M IAA, TDZ/NAA  
19 (50  $\mu$ M /5  $\mu$ M), 2,4-D/kinetine (50  $\mu$ M /5  $\mu$ M) and darkness.

20

### 21 Results

22 Expression level of *Ntann12* was evaluated in one-month-old T2 homozygous lines  
23 by immunoblot and qRT-PCR analysis in roots and leaves. As shown in Fig. S3, in

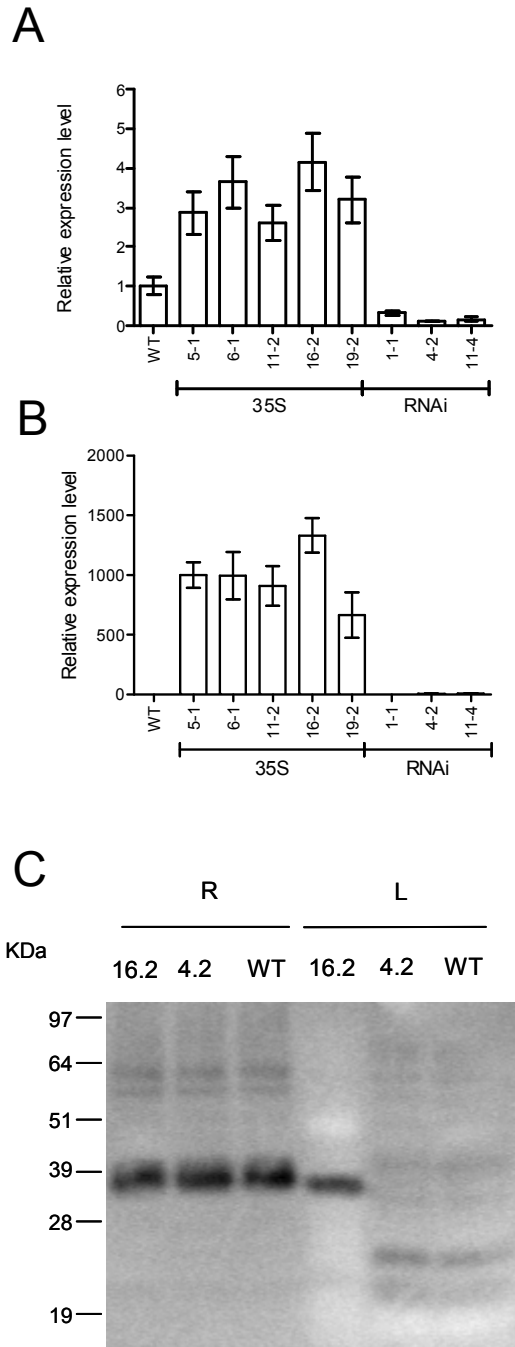

**Figure S3:** Characterization of T2 transgenic tobacco progenies overexpressing (35S) and downregulating (RNAi) *Ntann12*. (A) qRT-PCR analysis of *Ntann12* expression in roots. (B) qRT-PCR analysis of *Ntann12* expression in leaves. (C) Western blot analysis of total protein extracts (10  $\mu$ g) from roots and leaves of transgenic lines overexpressing and downregulating *Ntann12* and wild type using the anti-*Ntann12* antibodies. L, leaves; R, roots.

24 roots (Fig. S3A), *Ntann12* expression was estimated to be about 4 times more  
25 abundant in 35S plants than in non transgenic plants and about 4 times less  
26 abundant in RNAi plants than in non-transgenic plants. In leaves (Fig. S3B), *Ntann12*  
27 expression was estimated to be about 1000 times more abundant in 35S plants than  
28 in non-transgenic plants and no significant differences were measured for RNAi  
29 plants compared to in non-transgenic plants (Fig. S3B). One possible explanation of  
30 the lower overexpression level of *Ntann12* in roots compared to leaves in the 35S lines  
31 is that, in WT plants, *Ntann12* expression level is very high in roots and almost not  
32 present in leaves (Fig. 2). At the protein level, Ntann12 was present in both roots and  
33 leaves of 35S lines whereas in RNAi and WT plants Ntann12 was not detected in the  
34 leaves but was present in the roots (Fig. S3C). The RNAi lines examined are  
35 therefore not sufficiently down-regulated for Ntann12. Finally, no phenotypic  
36 differences between 35S, RNAi and non-transgenic plants were observed during  
37 germination and plant growth after *R. fascians* infection, after organogenesis initiation  
38 and after treatments with diverse growth factors or abiotic stress.

## References

**Karimi, M., Inzé, D. and Depicker, A.** (2002) GATEWAY™ vectors for *Agrobacterium*-mediated plant transformation. *Trends in Plant Sciences* **7**, 193-195.

**Livak KJ, Schmittgen TD.** 2001. Analysis of relative gene expression data using real-time quantitative PCR and the  $-2^{\Delta\Delta C_T}$  method. *Methods* **25**, 402-408.

**Vandeputte O, Oukouomi Lowe Y, Burssens S, van Raemdonck D, Hutin D, Boniver D, Geelen D, El Jaziri M, Baucher M.** 2007. The tobacco *Ntann12* gene, encoding an annexin, is induced upon *Rhodococcus fascians* infection and during leafy gall development. *Molecular Plant Pathology* **8**, 185-194.
